# Supplementary material
Source: PubMed Central journal article supplement (PMC4737259)
Supplement: EJI-45-492-s001.pdf [file EJI-45-492-s001.pdf]

# European Journal of Immunology

**Supporting Information**

**for**

**DOI 10.1002/eji.201444613**

Sorcha Cassidy, Sayak Mukherjee, Thet Mon Myint, Berenice Mbiribindi,  
Helen North, James Traherne, Arend Mulder, Frans HJ Claas, Marco A Purbhoo,  
Jayajit Das and Salim I Khakoo

**Peptide selectivity discriminates NK cells from KIR2DL2- and KIR2DL3-positive  
individuals**

Supporting Information Table 1: *Peptide concentrations used in the triple mix experiments*

| DA ( $\mu\text{M}$ ) | RA( $\mu\text{M}$ ) | FA( $\mu\text{M}$ ) | RA:FA (%) |
|----------------------|---------------------|---------------------|-----------|
| 0                    | 2                   | 8                   | 20:80     |
| 0                    | 4                   | 6                   | 40:60     |
| 0                    | 6                   | 4                   | 60:40     |
| 0                    | 8                   | 2                   | 80:20     |
| 2                    | 1.6                 | 6.4                 | 20:80     |
| 2                    | 3.2                 | 4.8                 | 40:60     |
| 2                    | 4.8                 | 3.2                 | 60:40     |
| 2                    | 6.4                 | 1.6                 | 80:20     |
| 4                    | 1.2                 | 4.8                 | 20:80     |
| 4                    | 2.4                 | 3.6                 | 40:60     |
| 4                    | 3.6                 | 2.4                 | 60:40     |
| 4                    | 4.8                 | 1.2                 | 80:20     |
| 6                    | 0.8                 | 3.2                 | 20:80     |
| 6                    | 1.6                 | 2.4                 | 40:60     |
| 6                    | 2.4                 | 1.6                 | 60:40     |
| 6                    | 3.2                 | 0.8                 | 80:20     |
| 8                    | 0.4                 | 1.6                 | 20:80     |
| 8                    | 0.8                 | 1.2                 | 40:60     |
| 8                    | 1.2                 | 0.8                 | 60:40     |
| 8                    | 1.6                 | 0.4                 | 80:20     |

Supporting Information Figure 1

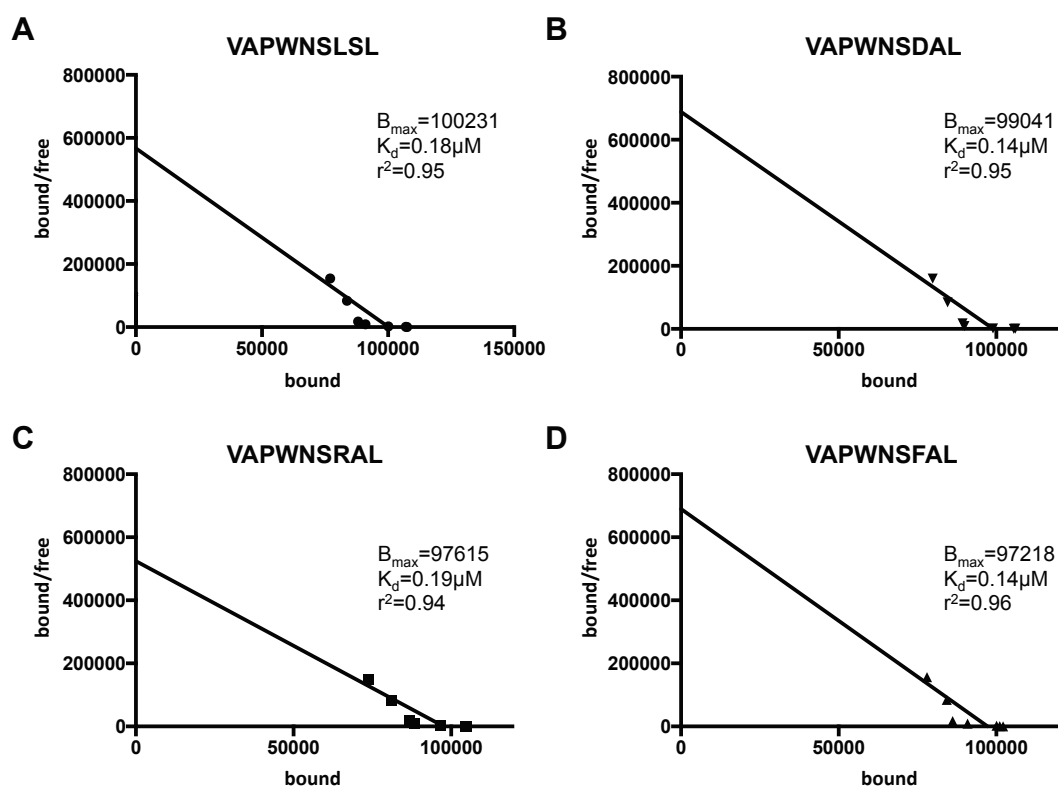

*Affinities of VAPWNSLSL derivative peptides for HLA-C\*0102*

Scatchard plots derived from stabilisation experiments of HLA-Cw\*0102 and analysis by flow cytometry using V6PG3. Panels A-D show the Scatchard plots for the data in Figure 1A and the associated regression line given by  $Y = B_{max} * X / (K_d + X)$  [GraphPad Prism6®] for the individual peptides. The dissociation constant ( $K_d$ ), maximal binding ( $B_{max}$ ) and correlation coefficients ( $r^2$ ) of the regression lines are shown.

Supporting Information Figure 2

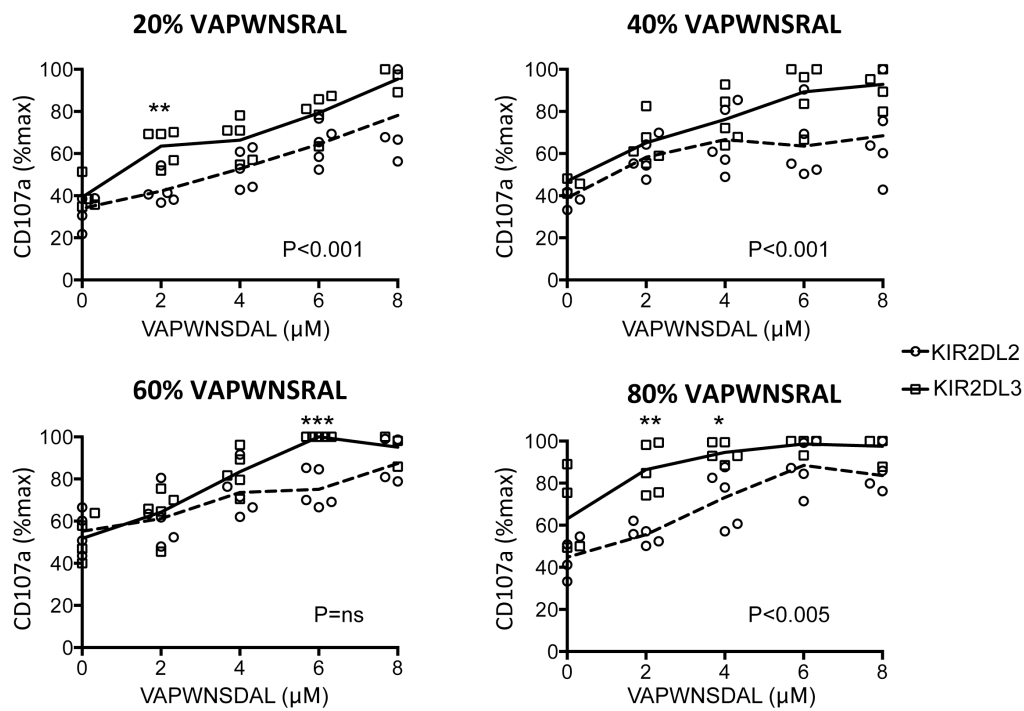

*Responses to changes in peptide repertoire for group 1 HLA-C-positive HLA-A\*11-negative donors.*

Data from Figure 3 for the five KIR2DL2 (circles) and five KIR2DL3 (squares) homozygous donors with ligands for KIR2DL2/3 but not KIR2DS2. The mean CD107a expression normalised to no peptide is shown by a dashed line (KIR2DL2 homozygous donors) or a full line (KIR2DL3 homozygous). Peptide concentrations are as for Figure 3 and indicated in Table 1. P values for the differences between the donors as determined by ANOVA are shown. For comparisons at individual peptide concentrations \*p<0.05, \*\*p<0.01, \*\*\*p<0.001.
